# Supplementary material for: Cell Therapy for Anal Sphincter Incontinence: Where Do We Stand?
Source: MDPI journal article supplement (doi:10.3390/cells10082086), 2021-08-13
Supplement: s1 [file s1]

**Table S1.** List and description of identified *in vivo* publications investigating cell therapy for the treatment of anal sphincter incontinence.

| Publication           | Short description                                                                                                                                                                                                | n  | Species | Concerned sphincter | Cellular therapy                                                                | Number of injected cell | Main outcomes                                        | Follow-up from cell therapy to outcome | Suggesting positive effect on ASI |
|-----------------------|------------------------------------------------------------------------------------------------------------------------------------------------------------------------------------------------------------------|----|---------|---------------------|---------------------------------------------------------------------------------|-------------------------|------------------------------------------------------|----------------------------------------|-----------------------------------|
| Li et al. 2020        | Compare im versus iv injection of bone-marrow PC after sphincter excision                                                                                                                                        | 96 | Rat     | IAS/EAS             | Allogeneic transplantation of bone-marrow derived progenitor cells              | 10 mio                  | Histology, anorectal manometry, electromyography, IF | 28 days                                | Yes                               |
| Dadhich et al. 2019   | Development of a clinically relevant model of ASI; harvesting of IAS SMC PC and NPC; generation and implantation of biosphincters                                                                                | 10 | NHP     | IAS                 | Biosphincters made from IAS SMC PC and enteric NPC                              | NA                      | Histology, anorectal manometry, IHC and IF           | 12 months                              | Yes                               |
| Sarveazad et al. 2019 | Assessment of adipose tissue PC and laser treatment directly after sphincterotomy                                                                                                                                | 35 | Rabbit  | IAS/EAS             | Xenotransplantation of human adipose tissue PC                                  | 2 mio                   | Histology, anorectal manometry, electromyography, IF | 12 weeks                               | Yes                               |
| Inoue et al. 2018     | Assessment of sheets of adipose tissue PC transplanted directly after sphincterotomy                                                                                                                             | 18 | Rat     | IAS/EAS             | Allogeneic transplantation of adipose tissue PC sheets                          | NA                      | Histology, anal manometry, IHC and IF                | 28 days                                | Yes                               |
| Kuismanen et al. 2018 | Assessment of human adipose tissue PC in saline solution or in polyacrylamide hydrogel injected immediately after sphincter injury compared to saline/hydrogel injection.                                        | 60 | Rat     | IAS/EAS             | Human adipose tissue PC injected into both ends of EAS                          | 0.3 mio                 | Histology, anal manometry, $\mu$ CT imaging          | 2, 4 weeks                             | Yes                               |
| Li et al. 2018        | Assessment of electroacupuncture on the homing of bone-marrow PC injected intravenously or into anal sphincters lesion compared to controls without injury, without electroacupuncture or without cell injection | 60 | Rat     | IAS/EAS             | Syngeneic bone-marrow PC injected into the tail vein                            | 9.6 mio                 | Histology, qPCR                                      | 1, 3, 7, 14 days                       | Yes                               |
| Trébol et al. 2018    | Comparison of labelled adipose tissue PC injection, adipose tissue PC seeded suture with sphincteroplasty or sphincteroplasty with normal                                                                        | 36 | Rat     | IAS/EAS             | Injection of cells into muscle edges or sphincter repair with MSC seeded suture | 1-3 mio                 | Histology                                            | 1, 4, 7days                            | No                                |

|                         |                                                                                                                                                                                                                                                                                                                                                       |    |        |             |                                                                                                             |                             |                                                              |           |     |
|-------------------------|-------------------------------------------------------------------------------------------------------------------------------------------------------------------------------------------------------------------------------------------------------------------------------------------------------------------------------------------------------|----|--------|-------------|-------------------------------------------------------------------------------------------------------------|-----------------------------|--------------------------------------------------------------|-----------|-----|
|                         | suture followed by labelled adipose tissue PC injection                                                                                                                                                                                                                                                                                               |    |        |             |                                                                                                             |                             |                                                              |           |     |
| Bohl et al. 2017        | Randomized controlled study to compare the effect of bioengineered autologous IAS sphincter implantation to sham implantation or no surgery at all.                                                                                                                                                                                                   | 20 | Rabbit | IAS         | Autologous biosphincters from IAS SMC PC and enteric NPC                                                    | 2 mio SMC PC and 0.8mio NPC | Anal manometry                                               | 12 weeks  | Yes |
| Sun et al. 2017         | Randomized controlled, comparison of MSC with scaffold to MSC with SDF-1 plasmid or SDF-1 plasmid alone                                                                                                                                                                                                                                               | 32 | Rat    | IAS and EAS | Injection of syngeneic bone marrow MSC at the end of the defect                                             | 0.8 mio                     | Anal manometry (basal tone)                                  | 4 weeks   | Yes |
| Sun et al. 2017         | Randomized controlled study comparing bone-marrow PC with scaffold to bone-marrow PC with SDF-1 plasmid or SDF-1 plasmid alone                                                                                                                                                                                                                        | 32 | Rat    | IAS/EAS     | Injection of syngeneic bone marrow PC at the end of the defect                                              | 0.8 mio                     | Anal manometry                                               | 8 weeks   | Yes |
| Sun et al. 2016         | Evaluate the effect of electrical stimulation on bone marrow PC implantation and bone marrow PC homing.                                                                                                                                                                                                                                               | 58 | Rat    | IAS/EAS     | Injection of syngeneic bone marrow PC at the end of the defect                                              | 1-2 mio                     | Anal manometry histology                                     | 4 weeks   | Yes |
| Ding et al. 2016        | Randomized controlled comparing end-to-end sphincteric repair versus end-to-end sphincteric repair with acellular dermal matrix versus end-to-end sphincteric repair with acellular dermal matrix seeded with bone marrow PC versus end-to-end sphincteric repair with acellular dermal matrix seeded with bone marrow PC C overexpressing galectin-1 | -  | Rat    | IAS/EAS     | Acellular dermal matrix with syngeneic bone marrow PC transfected with galectin-1 gene and sphincteroplasty | -                           | Histology                                                    | 6 weeks   | Yes |
| Mazzanti et al. 2016    | Comparison between minimally manipulated bone marrow-derived mononuclear cell and bone marrow PC                                                                                                                                                                                                                                                      | 32 | Rat    | IAS/EAS     | Injection of syngeneic bone marrow PC or bone marrow-derived mononuclear cells at the ends of the defect    | 3 mio                       | Histology, physiological functional evaluation, morphometric | 4 weeks   | Yes |
| Kajbafzadeh et al. 2016 | Comparing techniques of transplantation of decellularized external sphincter matrix with                                                                                                                                                                                                                                                              | 16 | Rabbit | EAS         | Injection of autologous myogenic satellite cells from quadriceps into                                       | 70 mio                      | Histology                                                    | 104 weeks | Yes |

|                       |                                                                                                                                                                                                            |    |     |         |                                                                                                                      |                                           |                                                  |                    |     |
|-----------------------|------------------------------------------------------------------------------------------------------------------------------------------------------------------------------------------------------------|----|-----|---------|----------------------------------------------------------------------------------------------------------------------|-------------------------------------------|--------------------------------------------------|--------------------|-----|
|                       | and without injection of myogenic satellite cells.                                                                                                                                                         |    |     |         | transplanted allogeneic decellularized EAS                                                                           |                                           |                                                  |                    |     |
| Oh et al. 2015        | Randomized controlled study comparing of muscle tissue PC injection with polycaprolactone beads versus no treatment                                                                                        | 15 | Dog | IAS/EAS | Injection into injury of autologous muscle tissue PC from hindlimb seeded in polycaprolactone beads                  | 10 mio                                    | Anal manometry (basal tone and contractile tone) | 12 weeks           | Yes |
| Oh et al. 2015        | Randomized controlled study comparing muscle tissue PC injection to fibroblast growth factor-loaded polycaprolactone beads versus no treatment                                                             | 10 | Dog | IAS/EAS | Injection into injury of autologous muscle tissue PC from hindlimb seeded in polycaprolactone beads                  | 60 mio                                    | Histology, anal manometry, electrophysiology     | 4 or 12 weeks      | Yes |
| Montoya et al. 2015   | Assessment of PEG-based hydrogel seeded myoblasts compared to a bulking agent                                                                                                                              | 80 | Rat | IAS/EAS | Re-exposition of sphincter edges and injection of commercial H9c2 rat heart myoblasts seeded in a PEG-based hydrogel | 3.2 mio                                   | Histology, electrophysiology, muscle volume      | 4 or 12 weeks      | Yes |
| Fitzwater et al. 2015 | Assessment of myoblast injection before sphincteroplasty versus sphincteroplasty alone                                                                                                                     | 40 | Rat | IAS/EAS | Injection of commercial H9c2 rat heart myoblasts before sphincteroplasty                                             | 3.2 mio                                   | Histology, muscle volume                         | 1 or 12 weeks      | No  |
| Salcedo et al. 2014   | Assessment of bone-marrow PC local injection 24hours or 3 weeks after injury and bone-marrow PC homing 3 weeks after intravenous injection compared to control without injury but bone-marrow PC injection | 50 | Rat | IAS/EAS | Injection of syngeneic bone-marrow PC into injury                                                                    | -                                         | Histology, anal manometry                        | 10 days or 5 weeks | Yes |
| Raghavan et al. 2014  | Preliminary report on heterotopic transplantation of human bioengineered internal sphincter in healthy athymic rats                                                                                        | -  | Rat | IAS     | Non-orthotopic transplantation of bioengineered internal sphincter with human SMC PC from IAS and human              | 0.5 mio SMC PC along with 0.2 enteric NPC | Histology, physiological functional evaluation   | 4 weeks            | NA  |

|                      |                                                                                                                                                             |     |        |         |                                                                                                                          |                    |                                                        |                                  |     |
|----------------------|-------------------------------------------------------------------------------------------------------------------------------------------------------------|-----|--------|---------|--------------------------------------------------------------------------------------------------------------------------|--------------------|--------------------------------------------------------|----------------------------------|-----|
|                      |                                                                                                                                                             |     |        |         | enteric NPCs from human rectum/colon                                                                                     |                    |                                                        |                                  |     |
| Elmi et al. 2014     | Assessment of the fate of sphincter transplanted labelled muscle tissue PC with MRI tracking                                                                | 12  | Rabbit | IAS/EAS | Autologous muscle tissue PC from quadriceps injected at the site of damage                                               | 90 mio             | Anal manometry, EMG, MRI                               | 1 hour, 1 week, 2 weeks, 4 weeks | Yes |
| Bisson et al. 2013   | Preliminary experiment on muscle tissue PC injection compared to saline injection                                                                           | -   | Rat    | IAS/EAS | Syngeneic injection of muscle tissue PC at the site of injury and into its borders                                       | 0.3-30 millions    | Histology, Anal manometry                              | 4 or 6 weeks                     | Yes |
| Jacobs et al. 2013   | Assessment of the safety of muscle tissue PC transplantation into anal sphincters                                                                           | 33  | Rat    | IAS/EAS | Syngeneic injection of muscle tissue PC from young rat hindlimbs into the damaged EAS only, followed by sphincteroplasty | 5 mio              | Histology                                              | 4 weeks                          | NA  |
| Kang et al. 2013     | Preliminary experiment on injection of polycaprolactone beads containing muscle tissue PC s after sphincter injury compared to beads alone                  | 10  | Dog    | IAS/EAS | Injection into injury of autologous myoblasts from gastrocnemius muscle seeded in polycaprolactone beads                 | -                  | Histology, Anal manometry, electrophysiology           | 12 weeks                         | No  |
| Lane t al. 2013      | Assessment of myoblasts injection during sphincteroplasty for a grade four episiotomy                                                                       | 33  | Rat    | IAS/EAS | Syngeneic injection of muscle tissue PC from young rat hindlimbs into the damaged EAS only, followed by sphincteroplasty | 5 mio              | Anal manometry, EMG                                    | 1 to 4 weeks                     | Yes |
| Salcedo et al. 2013  | Assessment of local bone-marrow PC injection 24hours after sphincter transection or pudendal nerve crushing compared to sham lesion and/or saline injection | 70  | Rat    | IAS/EAS | Injection of syngeneic bone-marrow PC into injury                                                                        | 2 mio              | Histology, anal manometry, EMG                         | 10 days                          | Yes |
| Pathi et al. 2012    | Assessment of local versus iv injection of bone-marrow PC controlled with PBS injection or no lesion                                                        | 224 | Rat    | IAS/EAS | Injection of syngeneic bone-marrow PC into injury or in the tail vein immediately after injury                           | 4 mio              | Histology, physiological functional evaluation, RT-PCR | 1day, 2 days 7days, 21days       | Yes |
| Raghavan et al. 2011 | Assessment of the functionality of human bioengineered circular                                                                                             | -   | Mouse  | IAS     | Transplantation of construct under the                                                                                   | 0.1mio mouse fetal | Histology, IHC,                                        | 4 weeks                          | NA  |

|                           |                                                                                                                                                                                                                        |     |        |         |                                                                              |                                 |                                                                     |                |     |
|---------------------------|------------------------------------------------------------------------------------------------------------------------------------------------------------------------------------------------------------------------|-----|--------|---------|------------------------------------------------------------------------------|---------------------------------|---------------------------------------------------------------------|----------------|-----|
|                           | sphincteric smooth muscle cell constructs seeded with mouse fetal enteric neurons (commercial) implantated heterotopically in healthy mice                                                                             |     |        |         | skin of <i>RAG1</i> ko mice with FGF pump                                    | enteric neurons, 0.4 mio SMC PC | physiological functionality evaluation                              |                |     |
| Craig et al 2010          | Assessment of the fate of muscle tissue PC transplanted into EAS                                                                                                                                                       | 4   | Rat    | EAS     | Injection of cells into the EAS under electromyographic guidance             | 1.5-4.5 mio                     | Histology                                                           | 10days         | NA  |
| Hashish et al. 2010       | Feasibility of bioengineered mouse circular sphincteric smooth muscle cell constructs heterotopically implanted in healthy mice                                                                                        | 10  | Mouse  | IAS     | Transplantation of construct under the skin of mice with FGF pump            | -                               | Histology                                                           | 4 weeks        | NA  |
| Raghavan et al. 2010      | Assessment of the functionality of mouse bioengineered circular sphincteric smooth muscle cell constructs with heterotopic implantation in healthy mice                                                                | 1   | Mouse  | IAS     | Transplantation of construct under the skin of mice with FGF pump            | 0.1 mio                         | Histology, IF, physiological functionality evaluation, western blot | 4 weeks        | NA  |
| Kajbafzadeh et al. 2010   | Feasibility study of local muscle tissue PC injection 3 weeks after sphincter injury compared to saline solution injection                                                                                             | 21  | Rabbit | EAS     | Injection into the defect of quadriceps tissue autologous PC                 | 70 mio                          | Histology, anal manometry, EMG                                      | 2, 4, 15 weeks | Yes |
| Miyasaka et al. 2011      | Assessment of continuous infusion of growth factors on the development of a heterotopically transplanted bioengineered circular sphincteric smooth muscle cell compared to transplantation without growth factors pump | 8   | Mouse  | IAS     | Transplantation of construct under the skin of mice with growth factors pump | -                               | Histology, IF, physiological functionality evaluation               | 4 weeks        | NA  |
| White et al. 2010         | Assessment of the effect of myoblast injection along with sphincteroplasty immediately after sphincterotomy controlled with sphincteroplasty alone or no reparation with or without cells injection                    | 120 | Rat    | IAS/EAS | Injection of commercial H9c2 rat heart myoblasts before sphincteroplasty     | 3.2 mio                         | physiological functionality evaluation                              | 1, 3 ,12weeks  | Yes |
| Aghaee-Afshar et al. 2009 | Assessment of rabbit bone-marrow PC or human umbilical cord matrix stem cells injections                                                                                                                               | 31  | Rabbit | EAS     | Injection of rabbit bone-marrow PC or human umbilical cord                   | 10'000                          | Histology, EMG                                                      | 2 weeks        | Yes |

|                     |                                                                                                                                              |    |     |             |                                                                                                      |         |                                                   |               |     |
|---------------------|----------------------------------------------------------------------------------------------------------------------------------------------|----|-----|-------------|------------------------------------------------------------------------------------------------------|---------|---------------------------------------------------|---------------|-----|
|                     | after external sphincter section compared to saline/cell medium injection                                                                    |    |     |             | matrix stem into injury with immunosuppression                                                       |         |                                                   |               |     |
| Saihara et al. 2009 | Assessment of the fate of GFP labeled muscle tissue PC transplanted into the levator ani                                                     | -  | Ra  | Levator ani | Skin incision and exposition of levator ani for Injection of GFP labelled muscle tissue PC s into it | 20 mio  | Histology                                         | 1, 2, 4 weeks | NA  |
| Kang et al. 2008    | Assessment of rat muscle tissue PC injection directly after cryoinjury compared to control without injection or without injury nor injection | 15 | Rat | EAS         | Injection of syngeneic gastrocnemius muscle tissue PC into injury                                    | 3 mio   | Histology, physiological functionality evaluation | 1 week        | No  |
| Lorenzi et al. 2008 | Preliminary study on injection of bone-marrow PC injection along with sphincteroplasty versus sham surgery or surgery with saline injection  | 24 | Rat | IAS/EAS     | Injection of syngeneic bone marrow PC at the end of the defect                                       | 1.5 mio | Histology, physiological functionality evaluation | 4 weeks       | Yes |

ASI: anal sphincter incontinence, EAS: External anal sphincter, IAS: Internal anal sphincter, IF: Immunofluorescence, im: intramuscular, iv:intravenous, NA: Not applicable, NPC: non-progenitor cells, EMG: Electromyography, FGF-2: Fibroblast growth factor MSC: Mesenchymal Stem Cells,  $\mu$ CT: micro computed tomography, mio:million PC: progenitor cells, PEG: polyethylene glycol, SMC: smooth muscle cells

**Table S2.** List of *in vitro* publications. EAS: External anal sphincter, IAS: Internal anal sphincter.

| Publication           | Aim/design                                                                                                                                                                                                                         | Species source | Concerned sphincter | Construct                                                 | Number of injected cell                                                                          | Outcomes                                                                                                                                                                      | Results                                                                                                                                                                                            |
|-----------------------|------------------------------------------------------------------------------------------------------------------------------------------------------------------------------------------------------------------------------------|----------------|---------------------|-----------------------------------------------------------|--------------------------------------------------------------------------------------------------|-------------------------------------------------------------------------------------------------------------------------------------------------------------------------------|----------------------------------------------------------------------------------------------------------------------------------------------------------------------------------------------------|
| Son et al. 2019       | Assess isolation of IAS and EAS after oncological surgery of the rectum and the effect of radiotherapy on the quality of isolation                                                                                                 | Human          | IAS/ EAS            | NA                                                        | NA                                                                                               | -Immunofluorescence<br>-Western blot<br>-rtPCR<br>-Viability assay                                                                                                            | Confirmation of expression profile.<br>Radiotherapy affect only cell viability                                                                                                                     |
| Zakheim et al. 2015   | Assess the potential of appendix-derived enteric neuronal progenitor cells on bioengineered sphincteric smooth muscle cell constructs                                                                                              | Rabbit         | IAS                 | Sylgard, two separated layer in a gel of collagen/laminin | 200'000 enteric neuronal progenitor cells with 500'000 sphincteric smooth muscle cell, initially | -Immunohistochemistry for neural and glial markers<br>-Western blot for neural and glial proteins expression and neurotransmitters<br>-Physiological functionality evaluation | Appendix-derived enteric neuronal progenitor cells are similar to small intestine-derived enteric neuronal progenitor cells                                                                        |
| Rego et al. 2015      | Assess the production of growth factors by bioengineered circular sphincteric smooth muscle cell constructs seeded with enteric neuronal progenitor cells and their contractility propriety compared to non-sphincteric constructs | Rabbit         | IAS                 | Sylgard, two separated layer in a gel of collagen/laminin | 200'000 enteric neuronal progenitor cells with 500'000 sphincteric smooth muscle cell, initially | -Immunohistochemistry for neural and glial markers<br>-Growth factors level assessment<br>-Physiological functionality evaluation                                             | Increased neural progenitor cells differentiation, physiological response to stimulation (contraction) and levels of BMP2 protein in sphincteric constructs compared to non sphincteric constrcuts |
| Gilmont et al. 2014   | Assess the feasibility of a bioengineered circular sphincteric smooth muscle cell constructs seeded with enteric neuronal progenitor cells, both of human origin                                                                   | Human          | IAS                 | Sylgard, two separated layer in a gel of collagen/laminin | 200'000 enteric neuronal progenitor cells with 500'000 sphincteric smooth muscle cell, initially | -PCR<br>-Immunohistochemistry<br>-Physiological functionality evaluation                                                                                                      | RNA for protein of contractile muscle, physiological response to stimulation (contraction)                                                                                                         |
| Singh and Rattan 2012 | Preliminary study with human bioengineered circular sphincteric smooth muscle cell constructs                                                                                                                                      | Human          | IAS                 | Sylgard, gel with collagen                                | 10 millions, initially                                                                           | -Physiological functionality evaluation<br>-Western blot<br>-Immunohistochemistry                                                                                             | Spontaneous basal tone, contraction following stimulation, Rho/ROCK dependence,                                                                                                                    |

|                    |                                                                                                |        |     |                           |   |                                                          |                                                                                                                                                                |
|--------------------|------------------------------------------------------------------------------------------------|--------|-----|---------------------------|---|----------------------------------------------------------|----------------------------------------------------------------------------------------------------------------------------------------------------------------|
| Somara et al. 2009 | Preliminary study with human bioengineered circular sphincteric smooth muscle cell constructs  | Human  | IAS | Sylgard, loose fibrin gel | - | -Physiological functionality evaluation<br>-Western blot | Spontaneous basal tone, contraction following stimulation, increased expression of PKC $\alpha$ , RHoA, CPI-17 and HSP27 compared to other smooth muscle cells |
| Hecker et al. 2005 | Preliminary study with rabbit bioengineered circular sphincteric smooth muscle cell constructs | Rabbit | IAS | Sylgard, loose fibrin gel | - | -Physiological functionality evaluation                  | Contraction following stimulation                                                                                                                              |
